# Supplementary material
Source: HighWire-hosted journal article supplement (https://jnm.snmjournals.org/highwire/filestream/95153/field_highwire_adjunct_files/0/185561_Supplemental_Data.pdf)
Supplement: 185561_Supplemental_Data.pdf [file 185561_Supplemental_Data.pdf]

## Extended explanation of Q.Clear reconstruction

Q.Clear uses a block sequential regularized expectation maximization (BSREM) method for reconstruction. It includes a point-spread function (PSF) modeling and controls the noise through the use of a penalty term<sup>1</sup>. The penalty term imposes more smoothing in lower activity regions and less smoothing in higher activity regions, resulting in smoother cold backgrounds and improved hot lesion signal-to-noise ratios. At the same time, the use of the penalty function allows an effective SUV convergence, providing more accurate values<sup>2-4</sup>.

The behavior of Q.Clear is controlled by a parameter  $\beta$ , included in the following penalty functions:

$$\Phi(x) = \sum_i y_i \log([Px]_i + r_i) - ([Px]_i + r_i) - \beta R(x) \quad (1)$$

$$R(x) = \sum_j \sum_{k \in N_j} w_{jk} \sqrt{\beta_j \beta_k} \frac{(x_j - x_k)^2}{x_j + x_k + \gamma |x_j - x_k|} \quad (2)$$

The parameter  $\gamma$  controls the importance of the relative difference of pixels, to avoid an oversmoothing, principally on the image edges<sup>5</sup>, although the unique possible user input parameter is the  $\beta$ .

- <sup>1</sup> S. Ahn and J.A. Fessler, "Globally convergent image reconstruction for emission tomography using relaxed ordered subsets algorithms," *IEEE Trans Med Imaging*. **22**(5), 613–626 (2003).
- <sup>2</sup> S. Ahn *et al.*, "Quantitative comparison of OSEM and penalized likelihood image reconstruction using relative difference penalties for clinical PET," *Phys Med Biol*. **60**(15), 5733–5751 (2015).
- <sup>3</sup> J. Nuyts and J.A. Fessler, "A penalized-likelihood image reconstruction method for emission tomography, compared to postsmoothed maximum-likelihood with matched spatial resolution," *IEEE Trans Med Imaging*. **22**(9), 1042–1052 (2003).
- <sup>4</sup> N. Parvizi, J.M. Franklin, D.R. McGowan, E.J. Teoh, K.M. Bradley, and F. V. Gleeson, "Does a novel penalized likelihood reconstruction of 18F-FDG PET-CT improve signal-to-background in colorectal liver metastases?" *Eur J Radiol*. **84**(10), 1873–1878 (2015).
- <sup>5</sup> J. Nuyts, D. Beque, P. Dupont, and L. Mortelmans, "A concave prior penalizing relative differences for maximum-a-posteriori reconstruction in emission tomography," *IEEE Trans Nucl Sci*. **49**(1), 56–60 (2002).

**Supplemental Table 1.** Image quality comparison using NEMA NU2-2012 for different reconstruction algorithms (256x256 matrix) and a lesion-to-background ratio of 2:1. Q.Clear with a  $\beta$  of 50, VPHD and VPHD-S using 12 subsets, 8 iterations, and a 2.0 mm gaussian filter.

| Sphere diameter (cm) | Contrast Recovery (%) |       |         | Background Variability (%) |       |         |
|----------------------|-----------------------|-------|---------|----------------------------|-------|---------|
|                      | VPHD                  | VPHDS | Q.Clear | VPHD                       | VPHDS | Q.Clear |
| 10                   | 27                    | 27    | 34      | 9.8                        | 9.0   | 5.8     |
| 13                   | 53                    | 55    | 65      | 7.9                        | 7.7   | 4.6     |
| 17                   | 75                    | 76    | 86      | 6.0                        | 6.0   | 3.6     |
| 22                   | 83                    | 84    | 90      | 4.8                        | 4.7   | 2.9     |
| 28                   | 70                    | 74    | 82      | 4.3                        | 4.4   | 2.7     |
| 37                   | 75                    | 79    | 85      | 3.9                        | 3.2   | 2.9     |
| Lung residual (%)    | -                     | -     | -       | 17.3                       | 15.9  | 10.3    |

**Supplemental Table 2.** Image quality comparison using NEMA NU2-2012 for different reconstruction algorithms (256x256 matrix) and a lesion-to-background ratio of 4:1. Q.Clear with a  $\beta$  of 50, VPHD and VPHD-S using 12 subsets, 8 iterations, and a 2.0 mm gaussian filter.

| Sphere diameter<br>(cm) | Contrast Recovery (%) |       |         | Background Variability (%) |       |         |
|-------------------------|-----------------------|-------|---------|----------------------------|-------|---------|
|                         | VPHD                  | VPHDS | Q.Clear | VPHD                       | VPHDS | Q.Clear |
| 10                      | 53                    | 56    | 62      | 9.3                        | 8.9   | 8.0     |
| 13                      | 53                    | 63    | 68      | 7.8                        | 7.5   | 6.7     |
| 17                      | 65                    | 76    | 75      | 6.1                        | 6.0   | 5.3     |
| 22                      | 75                    | 79    | 83      | 4.6                        | 4.5   | 4.1     |
| 28                      | 69                    | 70    | 80      | 3.5                        | 3.4   | 3       |
| 37                      | 74                    | 74    | 84      | 3.1                        | 3.1   | 2.9     |
| Lung residual<br>(%)    | -                     | -     | -       | 15.8                       | 15.1  | 9.2     |

**Supplemental Table 3.** Image quality comparison using NEMA NU2-2012 for different reconstruction algorithms (256x256 matrix) and a lesion-to-background ratio of 8:1. Q.Clear with a  $\beta$  of 50, VPHD and VPHD-S using 12 subsets, 8 iterations, and a 2.0 mm gaussian filter.

| Sphere diameter<br>(cm) | Contrast Recovery (%) |       |         | Background Variability (%) |       |         |
|-------------------------|-----------------------|-------|---------|----------------------------|-------|---------|
|                         | VPHD                  | VPHDS | Q.Clear | VPHD                       | VPHDS | Q.Clear |
| 10                      | 44                    | 45    | 60      | 8.3                        | 7.8   | 5.8     |
| 13                      | 53                    | 55    | 65      | 6.6                        | 6.5   | 4.6     |
| 17                      | 66                    | 67    | 86      | 5.5                        | 4.7   | 3.6     |
| 22                      | 73                    | 79    | 90      | 4.4                        | 4.1   | 2.9     |
| 28                      | 67                    | 69    | 82      | 3.4                        | 3.3   | 2.7     |
| 37                      | 74                    | 80    | 85      | 3.4                        | 3.3   | 2.9     |
| Lung residual<br>(%)    | -                     | -     | -       | 17.1                       | 15.8  | 10.3    |

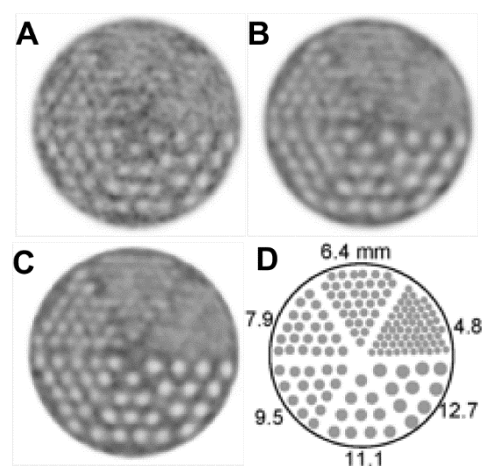

**Supplemental Figure 1.** Comparison of the Jaszczak phantom for the VPHD (A), VPHD-S (B), and Q.Clear (C) reconstructions, and (D) a cross-sectional schematic drawing of a Jaszczak phantom showing the position and diameter (in mm) of the 6 sectors of rods.

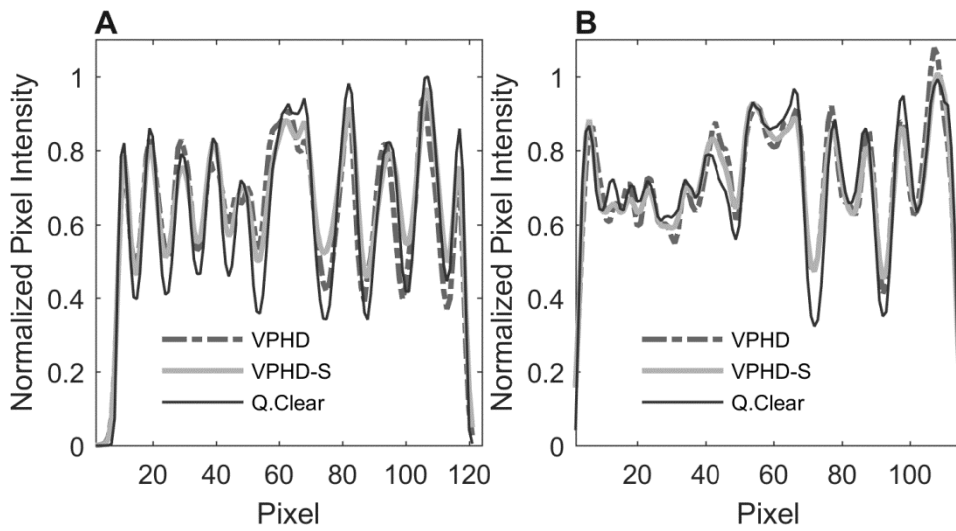

**Supplemental Figure 2.** Jaszczak phantom profiles: (A) horizontal across 9.5 mm and 12.7 mm rods and (B) vertical across 6.4 mm and 11.1 mm rods, for VPHD, VPHD-S, and Q.Clear reconstructions.

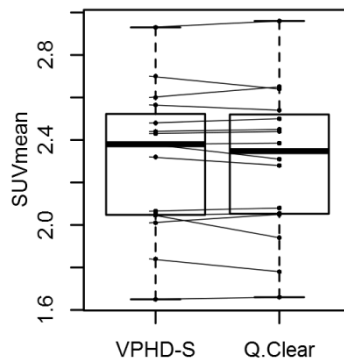

**Supplemental Figure 3.** Quantitative analysis of the liver VOI for VPHD-S and Q.Clear reconstructions in terms of  $SUV_{mean}$ .
